# Supplementary material for: Radiofrequency ablation versus partial hepatectomy with or without radiofrequency ablation for colorectal cancer liver metastases
Source: Research Square preprint supplement (doi:10.21203/rs.3.rs-7703592/v1), 2025-12-10
Supplement: Supplementary file 1 [file 489aab9a6bc8eb53be112034.xlsx]

## Sheet: Sheet1
Consent to publish：All authors agree to the publication and have signed the relevant consent form
Hospitalization Number	Gender	Age	Hepatectomy Time	Last Follow-up Time	PFS/Month	OS/Month	Survival Status	Lymph Node Metastasis	Primary Tumor Resection Time	Metastasis Time	Number of Hepatic Lesions	Maximum Diameter of the Largest Hepatic Lesion/mm	CEA	CRS	Whether Bilateral Lobes Are Involved	Number of Involved Hepatic Segments	CA19-9	First-line Chemotherapy Duration	First-line Chemotherapy Line	Albumin	Total Bilirubin	ALBI	PLT	Neutrophil Percentage	Surgical Approach
1367666	male	55	2018-01-24	2023-11-28	8	82	survival	0/18	2017-01-18	2018-01-09	1	＜3	1.76	1	No	1	6.28	6cycle	1	37.2	4.36	-21.9017	197	66.7	radiofrequency ablation of the liver
1565894	male	69	2020-06-19	2024-06-25	34	61	survival	12/18	2019-05-16	2020-04-23	1	2.6	4.2	2	yes	2	15	8cycle	1	33.1	28.2	-6.09547	110	63.5	radiofrequency ablation of the liver
1593697	male	59	2019-08-23	2023-11-28	10	51	survival	9/17	2019-08-23	2019-06-17	1	2.8	3.7	1	No	1	15	12cycle	1	43.6	10.6	-21.4784	196	66.3	radiofrequency ablation of the liver
1565750	male	81	2019-08-07	2020-10-19	11	16	death	0/10	2019-05-29	2019-04-30	5	3.3	46.5	1	yes	5	1091	2cycle	1	35.4	5.5	-18.8387	128	43.4	radiofrequency ablation of the liver
1250544	female	84	2020-09-27	2023-11-28	38	38	survival	0/17	2020-05-13	2020-09-17	2	3	13.7	2	yes	2	375.6	0	0	36.1	12.3	-14.1216	295	62.9	radiofrequency ablation of the liver
1592452	male	61	2019-10-23	2023-11-29	15	51	survival	0/16	2019-08-26	2019-10-13	1	1.8	3.7	1	No	1	15	20cycle	1	44.1	13.6	-20.2585	221	65.4	radiofrequency ablation of the liver
1658848	female	54	2021-02-05	2022-02-07	12	12	survival	1/17	2020-07-23	2020-10-26	2	1.1	4.2	3	No	2	15	6cycle+6cycle	2	42.3	19.1	-16.4871	149	75.9	radiofrequency ablation of the liver
1582874	male	60	2021-03-17	2023-11-28	4	52	survival	11/18	2019-07-12	2021-03-01	3	1	5.87	2	yes	3	37.1	8cycle+12cycle+12cycle	3	36.2	13.2	-13.7406	154	79.7	radiofrequency ablation of the liver
1501698	male	57	2018-08-22	2024-08-22	25	72	survival	4/10	2018-08-22	2018-08-13	1	2	119	1	No	1	441.5	0	0	42.6	19.4	-16.6392	219	59	radiofrequency ablation of the liver
1587113	male	59	2020-04-15	2024-01-15	14	53	survival	0/19	2019-07-31	2019-9-31	1	0.8	1.52	1	No	1	11.2	8cycle	1	37.3	10.1	-16.4423	68	65.4	radiofrequency ablation of the liver
1660849	female	62	2021-09-26	2022-03-15	16	16	death	2/21	2020-10-19	2021-07-14	1	1.7	29.4	2	No	1	104.2	4cycle	1	40.3	9.7	-19.259	203	39.9	radiofrequency ablation of the liver
1423670	male	65	2017-11-13	2023-11-29	46	74	survival	0/15	2017-09-20	2017-09-19	1	6	1.92	1	No	1	19.65	6cycle+5cycle	2	35.3	9	-15.5033	267	65.3	radiofrequency ablation of the liver
1713371	female	60	2021-03-15	2023-11-28	7	32	survival	5/18	2021-03-10	2021-03-03	1	2	3.71	2	No	1	15.45	8cycle+8cycle+7cycle	3	37.9	20.3	-12.3449	109	48	radiofrequency ablation of the liver
1737425	male	47	2021-11-12	2023-11-28	24	24	survival	2/15	2021-06-17	2021-09-16	1	1	3.7	2	No	1	20	8cycle	1	33.8	9.5	-13.8715	111	63.7	radiofrequency ablation of the liver
1718815	female	35	2021-07-22	2023-11-28	8	28	survival	6/17	2021-07-22	2021-07-22	5	2	3.47	3	yes	5	30.11	6cycle	1	36.2	22.3	-10.2797	194	64.4	radiofrequency ablation of the liver
1798988	male	71	2022-05-12	2023-11-28	4	18	survival	0/10	2022-03-17	2022-04-20	1	1.3	172	1	No	1	30	4cycle	1	43.1	13.7	-19.3602	206	64.1	radiofrequency ablation of the liver
1572903	male	56	2019-06-04	2023-11-13	35	53	death	3/12	2019-06-04	2019-06-04	1	2.5	641	3	No	1	172.5	8cycle+2cycle	2	34.2	32.6	-6.07354	122	66.9	radiofrequency ablation of the liver
1818245	male	60	2022-05-25	2023-10-13	15	16	survival	2/14	2022-04-27	2022-05-23	1	3.2	35.8	2	No	1	5.35	6cycle	1	29.3	8.5	-10.7806	306	69.3	radiofrequency ablation of the liver
1270194	female	78	2022-07-12	2023-06-15	1	11	death	12/16	2021-11-30	2022-03-07	1	1.5	2.03	2	No	1	36.11	5cycle+2cycle	2	29.2	15.1	-6.90301	123	61	radiofrequency ablation of the liver
1736354	male	58	2022-03-08	2023-10-26	3	19	survival	9/10	2022-03-08	2021-06-08	5	1.9	10.2	3	No	4	13.67	8cycle	1	45.4	15.9	-20.3323	270	64	radiofrequency ablation of the liver
1644850	male	61	2022-08-24	2023-11-28	15	15	survival	6/18	2020-05-20	2022-08-08	2	2.2	3.7	2	No	1	20	10cycle+4cycle	2	38.2	14.3	-14.9123	163	64.4	radiofrequency ablation of the liver
1773320	male	54	2021-11-25	2024-07-26	7	32	survival	2/16	2021-11-24	2021-11-17	1	0.8	9.82	2	No	1	509.5	8cycle	1	33.3	8.5	-14.1806	133	59.6	radiofrequency ablation of the liver
1695936	male	52	2020-12-25	2023-11-28	2	35	survival	7/18	2020-12-25	2020-12-09	4	1.8	56.4	3	yes	3	240	7cycle	1	35	39.3	-5.51992	98	42.2	radiofrequency ablation of the liver
1725986	male	70	2021-04-29	2024-06-11	18	37	survival	1/22	2021-04-29	2021-04-29	1	0.5	4.47	2	No	1	11.73	11cycle+3cycle	2	24.5	33.2	2.29183	62	87.3	radiofrequency ablation of the liver
1811987	female	45	2022-03-11	2024-07-23	5	28	survival	0/24	2022-03-11	2022-03-11	2	2	1.57	1	No	2	7.44	8cycle	1	36.7	14.1	-13.7302	137	84.3	radiofrequency ablation of the liver
1742050	female	53	2021-07-09	2024-01-02	15	29	survival	0/20	2021-07-09	2021-07-09	1	2.6	17.4	1	No	2	48.4	5cycle	1	43.8	15.9	-18.9723	224	57.4	radiofrequency ablation of the liver
1778854	male	52	2021-12-15	2023-08-03	19	19	survival	4/16	2022-12-15	2021-12-01	4	2.1	3.7	3	yes	4	20	6cycle	1	33.2	3.7	-19.585	360	58.1	radiofrequency ablation of the liver
1858887	male	75	2022-11-05	2024-07-30	20	20	survival	1/16	2022-10-12	2022-11-04	1	1.7	2.46	2	No	1	15.7	0	0	36.5	11.9	-14.6798	203	60.3	radiofrequency ablation of the liver
1790720	female	38	2021-12-07	2023-12-13	24	24	survival	2/10	2021-12-07	2021-05-11	3	2.3	10.3	3	No	3	35	6cycle	1	31.3	25.8	-5.15253	65	58.5	radiofrequency ablation of the liver
1855121	male	52	2022-11-23	2023-11-30	4	12	survival	2/13	2022-11-23	2022-09-23	4	0.8	2.11	3	No	1	13.2	0	0	30	17.6	-6.57187	253	58	radiofrequency ablation of the liver
1726709	male	31	2021-10-13	2023-11-28	13	25	survival	13/15	2021-10-13	2021-04-20	2	0.8	4.1	3	yes	2	7.73	4cycle	1	41.1	10.6	-19.3534	188	58.1	radiofrequency ablation of the liver
1116113	female	55	2022-10-28	2023-11-28	2	13	survival	0/2	2022-10-28	2022-05-26	8	3.5	1.83	2	No	4	8.6	6cycle	1	46	7.6	-25.7142	177	43.8	radiofrequency ablation of the liver
1819826	male	60	2022-06-08	2023-11-28	6	17	survival	0/10	2022-06-08	2022-06-02	2	3	3.95	2	yes	2	11.69	9cycle	1	38.1	13	-15.4563	195	52.4	radiofrequency ablation of the liver
1907291	male	67	2023-04-01	2024-10-22	18	18	survival	0/19	2020-07-17	2023-03-06	1	2.2	0.881	0	No	1	5.5	0	0	45.5	19.8	-18.9695	174	80.9	radiofrequency ablation of the liver
1867558	male	48	2023-04-12	2024-05-11	10	12	survival	8/16	2021-06-03	2022-11-07	3	2.8	7.02	1	No	2	60.5	8cycle+7cycle	2	37.8	15.4	-14.0832	163	46.4	radiofrequency ablation of the liver
1759112	male	60	2021-11-10	2023-11-29	16	24	survival	0/16	2021-11-10	2021-09-14	1	1	8.12	1	No	1	61.7	2cycle+4cycle	2	45.7	33.2	-15.7282	177	81.9	radiofrequency ablation of the liver
1891990	male	28	2023-04-26	2023-11-29	7	7	survival	2/15	2023-02-21	2023-04-18	2	1.2	2.04	3	yes	2	6.5	2cycle	1	32.6	13.6	-10.4835	278	82.1	radiofrequency ablation of the liver
1885420	male	67	2023-05-18	2024-06-12	12	12	survival	1/9	2022-12-15	2023-04-25	4	1.2	17.2	3	No	3	11.3	3cycle	1	41.7	16.1	-17.1048	123	43.1	radiofrequency ablation of the liver
1688454	female	62	2023-07-05	2023-11-29	4	4	survival	0/7	2023-07-05	2023-04-23	3	3.5	1.89	2	No	3	15	3cycle	1	44	11.4	-21.3382	279	60.3	radiofrequency ablation of the liver
1833681	female	68	2023-07-18	2024-10-14	14	14	survival	5/10	2023-07-18	2022-07-13	4	2	2.29	3	yes	3	15	18cycle	1	38.1	11.5	-16.2655	157	39.5	radiofrequency ablation of the liver
1968019	female	53	2023-11-21	2024-08-16	8	8	survival	3/7	2022-09-24	2023-09-18	8	1.3	3.26	2	yes	5	19.2	8cycle+4cycle	2	41.9	40.8	-11.1377	133	71.9	radiofrequency ablation of the liver
1834109	male	66	2024-01-09	2024-02-23	1	1	survival	9/16	2022-06-10	2022-07-13	1	2.4	27.5	2	No	1	14.2	2cycle	1	41	20.2	-15.0125	258	78	radiofrequency ablation of the liver
1710149	female	57	2022-09-19	2024-03-27	14	18	survival	4/16	2023-06-20	2022-09-16	1	2.1	3.7	2	No	1	17.1	5cycle+1cycle	2	41.5	5.4	-24.1448	249	72.7	radiofrequency ablation of the liver
2003615	male	70	2024-03-11	2024-04-12	1	1	survival	3/16	2024-01-16	2024-02-26	3	1.2	3.26	3	yes	3	93.2	0	0	46.7	9.3	-24.9769	221	37.6	radiofrequency ablation of the liver
1907685	male	57	2024-04-07	2024-06-26	2	2	survival	1/15	2023-04-06	2024-04-01	1	2.8	69.1	1	No	1	25.5	4cycle	1	31.2	8.3	-12.5527	198	56.6	radiofrequency ablation of the liver
1541455	female	53	2020-05-21	2023-11-28	42	42	survival	0/14	2019-03-08	2020-03-11	1	3	4.1	0	No	1	20	10cycle+2cycle	2	37.3	7.2	-18.6761	272	48.3	partial hepatectomy
1562932	male	57	2020-05-19	2023-11-28	55	55	death	9/13	2019-04-23	2020-04-27	1	4	3.42	1	No	1	54.15	6cycle	1	41.3	18	-16.0285	210	79.3	partial hepatectomy
1321706	female	64	2020-06-01	2022-11-23	29	29	survival	4/4	2016-04-17	2020-05-22	3	1.5	4.05	2	yes	2	20	12cycle	1	34.9	2.4	-23.8869	223	45.4	partial hepatectomy
1106185	female	77	2020-07-02	2023-10-13	39	39	survival	0/18	2019-09-16	2020-06-25	2	3.5	4.31	2	yes	3	16.18	4cycle+8cycle	2	27.1	17.2	-4.2586	243	63.3	partial hepatectomy
1407376	male	65	2018-07-13	2022-09-17	23	62	death	3/10	2017-07-17	2018-06-26	1	1.5	14.67	2	No	1	9.1	20cycle	1	31.2	18.2	-7.37062	114	87.4	partial hepatectomy
1590031	male	57	2020-08-04	2022-09-15	20	25	death	15/16	2019-07-06	2020-06-09	4	3.5	19.4	3	No	2	400.4	8cycle+5cycle+10cycle	3	42	24.6	-14.5619	165	55.2	partial hepatectomy
1413633	male	62	2020-08-03	2022-07-15	24	24	death	1/13	2017-08-09	2019-09-04	1	2.2	11	1	No	1	14.1	8+9cycle	2	39.9	10.3	-18.5229	204	63.1	partial hepatectomy
1571177	female	73	2020-08-31	2023-01-15	7	43	death	9/15	2019-05-30	2020-05-26	1	3.8	1.34	2	No	1	7.03	3cycle+15cycle	2	40.1	14.6	-16.3903	178	51.8	partial hepatectomy
1653873	male	49	2020-09-30	2023-11-28	37	37	survival	3/17	2020-09-30	2020-06-18	3	3	1.4	3	yes	2	7.27	4cycle	1	34.4	14.7	-11.5002	111	84.6	partial hepatectomy
1652344	male	62	2020-06-23	2023-11-28	3	41	survival	5/11	2020-06-23	2020-06-23	1	2	5.87	2	No	1	76.65	8cycle	1	39	7.9	-19.5087	233	70.6	partial hepatectomy
1552735	male	64	2019-03-15	2023-11-28	20	56	survival	7/13	2019-03-15	2019-03-15	3	3.2	5.23	3	No	3	16.09	6cycle+12cycle	2	42	22.8	-15.0634	203	64.7	partial hepatectomy
1637982	female	60	2020-04-21	2023-11-28	7	43	survival	9/16	2020-04-21	2020-04-21	2	2	3.09	3	yes	2	18.34	7cycle+4cycle	2	39.5	4.39	-23.8114	240	55.2	partial hepatectomy
1521580	male	31	2018-11-28	2023-11-28	25	60	survival	0/37	2018-11-28	2018-11-21	1	6.5	7.29	1	No	1	27.69	10cycle	1	46.7	12	-23.2946	145	83	partial hepatectomy
1708876	female	63	2021-03-01	2023-02-15	23	23	death	6/17	2021-03-01	2021-03-01	1	2.5	117	2	No	1	193.4	9cycle	1	28.6	10.5	-8.79092	271	70.7	partial hepatectomy
1712550	male	60	2021-03-09	2023-11-28	32	32	survival	4/14	2020-09-28	2020-09-20	2	1	2.05	3	No	2	6.87	6cycle	1	31.7	21.3	-6.75753	103	73.5	partial hepatectomy
1678426	female	55	2021-05-17	2023-11-28	5	37	survival	3/24	2020-10-22	2021-04-27	3	3	22	3	No	2	22.5	3cycle+3cycle+3cycle	3	36.2	8.1	-16.9637	156	54.1	partial hepatectomy
1382393	female	71	2021-05-24	2023-11-29	30	30	survival	0/27	2021-05-24	2021-02-05	1	2.6	13.6	1	No	1	44.61	4cycle	1	35.6	36.3	-6.554	80	87.5	partial hepatectomy
1607186	male	38	2021-07-01	2023-11-29	28	28	survival	6/12	2019-10-24	2021-06-11	2	2	1.9	2	No	2	9.15	3cycle	1	44.1	33.3	-14.3483	156	64.8	partial hepatectomy
1590842	male	60	2021-07-06	2022-05-14	10	10	death	3/28	2021-07-06	2021-06-24	2	7	49.6	3	No	2	489.6	7cycle	1	32.9	5.6	-16.5947	387	76.3	partial hepatectomy
1699358	female	68	2021-07-15	2023-11-28	28	28	survival	7/10	2021-01-14	2021-01-08	3	2.2	5.81	3	yes	3	6.88	5cycle	1	39.2	9	-18.8183	144	33.7	partial hepatectomy
1249186	male	65	2021-08-24	2023-11-28	27	27	survival	0/25	2015-07-16	2021-08-04	1	4	86.3	0	No	1	30.7	12cycle	1	41.6	29.8	-12.9562	156	66.5	partial hepatectomy
1153246	female	36	2023-10-12	2024-08-02	8	50	survival	0/14	2020-05-06	2021-05-15	4	0.9	1.98	1	No	4	21.65	5cycle+4cycle+7cycle	3	37.4	14.9	-13.961	189	68.4	partial hepatectomy
1691634	female	59	2021-01-06	2023-09-15	8	32	death	3/18	2021-01-06	2020-12-01	4	1	3.1	3	No	3	20	2cycle	1	34.8	24.5	-8.46876	145	36.6	partial hepatectomy
1638520	male	64	2020-04-22	2024-09-23	18	53	survival	3/9	2020-04-22	2020-04-10	2	3.5	53.9	3	No	1	17.62	8cycle+8cycle	2	43.4	12.8	-20.0637	170	90.5	partial hepatectomy
1724621	male	65	2021-11-25	2022-09-19	9	9	survival	0/16	2021-04-17	2021-04-17	4	6.5	34.6	1	yes	4	33.81	27cycle	1	31.5	6.2	-14.733	150	55.1	partial hepatectomy
1785402	male	69	2022-02-14	2024-04-03	6	25	survival	0/18	2022-02-14	2022-01-25	1	5	33.7	2	No	1	33	6cycle	1	32.9	24.5	-6.85376	205	51.6	partial hepatectomy
1809357	male	64	2022-05-06	2024-08-12	27	27	survival	2/15	2022-05-06	2022-04-22	3	3	10.2	2	yes	3	71.61	8cycle	1	40.1	19.1	-14.6171	184	74.3	partial hepatectomy
1715323	female	51	2022-05-11	2022-10-08	4	4	death	9/16	2021-08-18	2021-12-02	1	4	4.35	2	No	1	112.6	4cycle+4cycle	2	36.8	8.4	-17.2337	158	73.3	partial hepatectomy
1697320	female	50	2020-12-30	2023-11-02	16	34	survival	0/32	2020-12-30	2020-12-24	1	4	384	2	No	1	845.8	9cycle+2cycle	2	34.1	14.2	-11.4736	158	89	partial hepatectomy
1670127	male	56	2022-06-30	2024-08-09	23	25	survival	0/11	2020-12-03	2022-06-15	1	2.5	6.9	0	No	1	48.678	2cycle	1	38.9	24.7	-11.9001	171	77.2	partial hepatectomy
1685602	male	69	2022-07-07	2023-11-28	16	16	survival	0/16	2020-11-10	2022-06-22	1	2	3.02	0	No	1	22.32	4cycle	1	44.2	14.1	-20.1052	161	56.7	partial hepatectomy
1807567	female	57	2022-07-29	2023-11-28	15	15	survival	0/18	2022-04-12	2022-04-12	5	2	1.61	1	No	4	19.8	6cycle+2cycle	2	41	10.4	-19.3941	259	44.4	partial hepatectomy
1734200	male	63	2022-09-02	2023-11-28	14	14	survival	0/8	2019-08-01	2022-06-20	1	1	4.06	0	No	1	13.66	8cycle+6cycle	2	46.3	18.3	-20.1695	137	62.1	partial hepatectomy
1841331	male	57	2022-10-13	2023-11-28	13	13	survival	10/10	2021-06-09	2022-08-02	1	2	3.82	1	No	1	11.22	8cycle	1	42.9	10.4	-21.0091	202	53.8	partial hepatectomy
1823160	male	80	2022-10-25	2023-11-28	13	13	survival	0/14	2022-06-15	2022-09-27	1	2	7.89	1	No	1	21.59	0	0	36.6	13.3	-14.0308	131	67.9	partial hepatectomy
1806258	male	62	2022-04-19	2023-12-29	4	20	survival	3/18	2022-04-19	2022-04-11	1	3	5.07	2	No	1	22.15	4cycle+4cycle	2	30.9	20.6	-6.29808	73	58.5	partial hepatectomy
1873021	male	64	2022-12-13	2023-11-28	11	11	survival	0/11	2022-01-01	2022-11-15	1	4	4.2	1	No	1	9.3	1cycle+4cycle	2	27.9	13.6	-6.48854	77	59.7	partial hepatectomy
1833106	female	51	2023-01-11	2023-11-28	10	10	survival	6/20	2023-01-11	2022-07-13	4	3.8	7.95	3	No	2	27.8	6cycle	1	32.2	6.9	-14.622	236	72.5	partial hepatectomy
1889955	male	63	2023-02-21	2023-11-23	9	9	death	13/17	2023-02-21	2022-10-13	1	8.6	190	3	No	1	22.3	2cycle	1	36.3	14	-13.4372	166	90	partial hepatectomy
1866611	male	65	2023-04-20	2023-11-29	7	7	survival	1/13	2022-11-18	2022-11-09	2	5	39.7	2	No	2	66.8	2cycle	1	33.4	22.1	-7.95919	80	57.2	partial hepatectomy
1915466	male	65	2023-04-28	2023-11-29	7	7	survival	0/16	2022-01-01	2023-04-11	1	2	53.8	0	yes	2	85.8	0	0	35.5	32	-7.30114	157	65.8	partial hepatectomy
1880945	female	39	2023-05-15	2023-11-29	6	6	survival	5/22	2023-01-18	2023-01-11	1	2.2	3.85	2	No	2	9.3	5cycle	1	44.6	9.3	-23.1919	324	92.9	partial hepatectomy
1888262	male	58	2023-02-23	2024-08-30	18	18	survival	2/18	2023-05-22	2023-02-02	2	11.5	864	5	yes	2	1663	3cycle	1	28	11.1	-7.91416	248	78.3	partial hepatectomy
1882893	female	72	2023-02-02	2024-08-30	9	18	survival	1/24	2023-02-02	2023-01-23	3	3	14.3	3	No	1	57.6	8cycle+4cycle	2	32.1	12.2	-10.7755	324	59.9	radiofrequency ablation of the liver
1847888	female	48	2023-07-13	2023-11-29	4	4	survival	0/24	2022-09-14	2022-08-30	4	7	457	3	yes	2	203.5	11cycle	1	46.2	6.1	-27.3353	251	57.9	partial hepatectomy
1883944	male	65	2023-08-02	2024-11-29	4	13	survival	6/17	2023-02-01	2023-07-31	2	2.2	22.8	3	yes	2	49.6	5cycle+4cycle	2	39.8	11.6	-17.6534	235	60.4	radiofrequency ablation of the liver
1759457	male	40	2023-07-21	2023-11-29	4	4	survival	5/12	2021-09-22	2023-07-09	1	1.95	3.38	1	No	1	1.83	8cycle	1	43.1	18.1	-17.522	208	53.5	partial hepatectomy
1845824	male	75	2023-07-24	2023-11-29	4	4	survival	3/9	2023-02-10	2023-07-15	1	3	205	3	No	1	0.5	3cycle	1	32.7	25	-6.55042	131	78.2	partial hepatectomy
1826090	male	66	2023-08-29	2023-11-29	3	3	survival	4/19	2022-06-24	2023-04-13	5	2	6.55	3	yes	3	22.8	8cycle+6cycle	2	53.1	14.2	-27.6236	129	86.3	partial hepatectomy
1959609	male	55	2023-09-06	2024-11-29	5	12	survival	9/13	2023-09-06	2023-09-06	4	2	38.6	3	No	2	17.7	1cycle+9cycle	2	34.8	9.1	-15.0054	232	39	radiofrequency ablation of the liver
1754656	male	69	2022-03-30	2023-11-29	13	19	survival	1/10	2022-03-30	2021-08-25	2	1	6.72	3	No	1	35.8	10cycle	1	39.5	8	-19.8507	255	41.8	partial hepatectomy
1962241	male	73	2023-09-15	2024-12-19	7	11	survival	2/13	2023-09-12	2023-09-05	1	3.5	59.1	2	No	1	14.9	8cycle	1	51.8	15.9	-25.7723	178	80.5	radiofrequency ablation of the liver
1808657	female	65	2022-10-01	2023-11-29	10	13	survival	0/24	2021-12-17	2022-10-20	4	8.5	25	3	yes	4	22.4	6cycle	1	34.4	9.9	-14.1093	165	62.3	partial hepatectomy
1830180	female	54	2022-10-13	2024-09-06	13	22	survival	4/12	2023-02-02	2022-07-01	4	2.5	2.73	3	yes	4	22	5cycle	1	32.7	11.6	-11.6184	163	84.4	partial hepatectomy
1884167	male	40	2023-02-03	2024-09-30	12	19	survival	5/16	2023-02-18	2023-01-29	1	5	15.6	2	No	1	21.5	8cycle	1	40.9	13	-17.8363	207	80.2	partial hepatectomy
1969979	male	43	2024-05-14	2024-08-15	3	3	survival	0/31	2023-10-11	2024-04-12	4	2	3.24	2	yes	3	9.1	0	0	45.8	15.3	-20.9262	201	56.8	partial hepatectomy
1151763	male	71	2024-05-21	2024-06-21	1	1	survival	0/12	2023-03-08	2024-05-01	2	3	8.77	1	No	1	17.2	12cycle	1	46.1	10.3	-23.7929	183	64	partial hepatectomy
2057885	female	63	2024-07-08	2024-08-15	1	1	survival	0/16	2024-06-17	2024-06-17	1	6	11.7	1	yes	2	35.5	0	0	38.8	11.3	-16.9763	263	52.7	partial hepatectomy
1954051	female	55	2024-07-16	2024-08-16	1	1	survival	6/16	2023-08-17	2024-06-29	1	0.8	1.13	2	No	1	5.6	12cycle+3cycle	2	41.1	9	-20.4333	260	64.4	partial hepatectomy
1889285	male	73	2023-02-22	2024-10-21	17	19	survival	0/15	2023-02-22	2023-01-29	1	2	2.2	1	No	1	3.7	5cycle	1	32.9	9.4	-13.1763	106	40.4	partial hepatectomy
1974422	female	65	2023-10-30	2024-12-19	9	10	survival	1/26	2023-10-30	2023-10-16	3	1.2	185	3	No	2	750.6	0	0	33.2	34.3	-4.88804	70	86	radiofrequency ablation of the liver
1954996	male	49	2024-08-30	2024-10-09	1	1	survival	0/16	2023-08-21	2024-08-24	3	3.5	2.99	1	yes	3	13.8	0	0	37.9	50.6	-6.31692	81	95	partial hepatectomy
2087892	male	52	2024-09-14	2024-10-16	1	1	survival	0/16	2024-04-10	2024-02-19	1	2.4	1.74	1	No	1	8.5	2cycle	1	38.6	8	-19.0857	156	88.5	partial hepatectomy
2059406	male	58	2024-09-12	2024-10-11	1	0	survival	7/15	2021-06-02	2023-12-15	4	3.1	35.1	2	yes	2	15.5	0	0	39.5	13.9	-16.2045	155	82.3	partial hepatectomy
